# Supplementary material for: Genotyping by Sequencing Using Specific Allelic Capture to Build a High-Density Genetic Map of Durum Wheat
Source: PubMed Central journal article supplement (PMC4865223; doi:10.1371/journal.pone.0154609), 2016-05-12

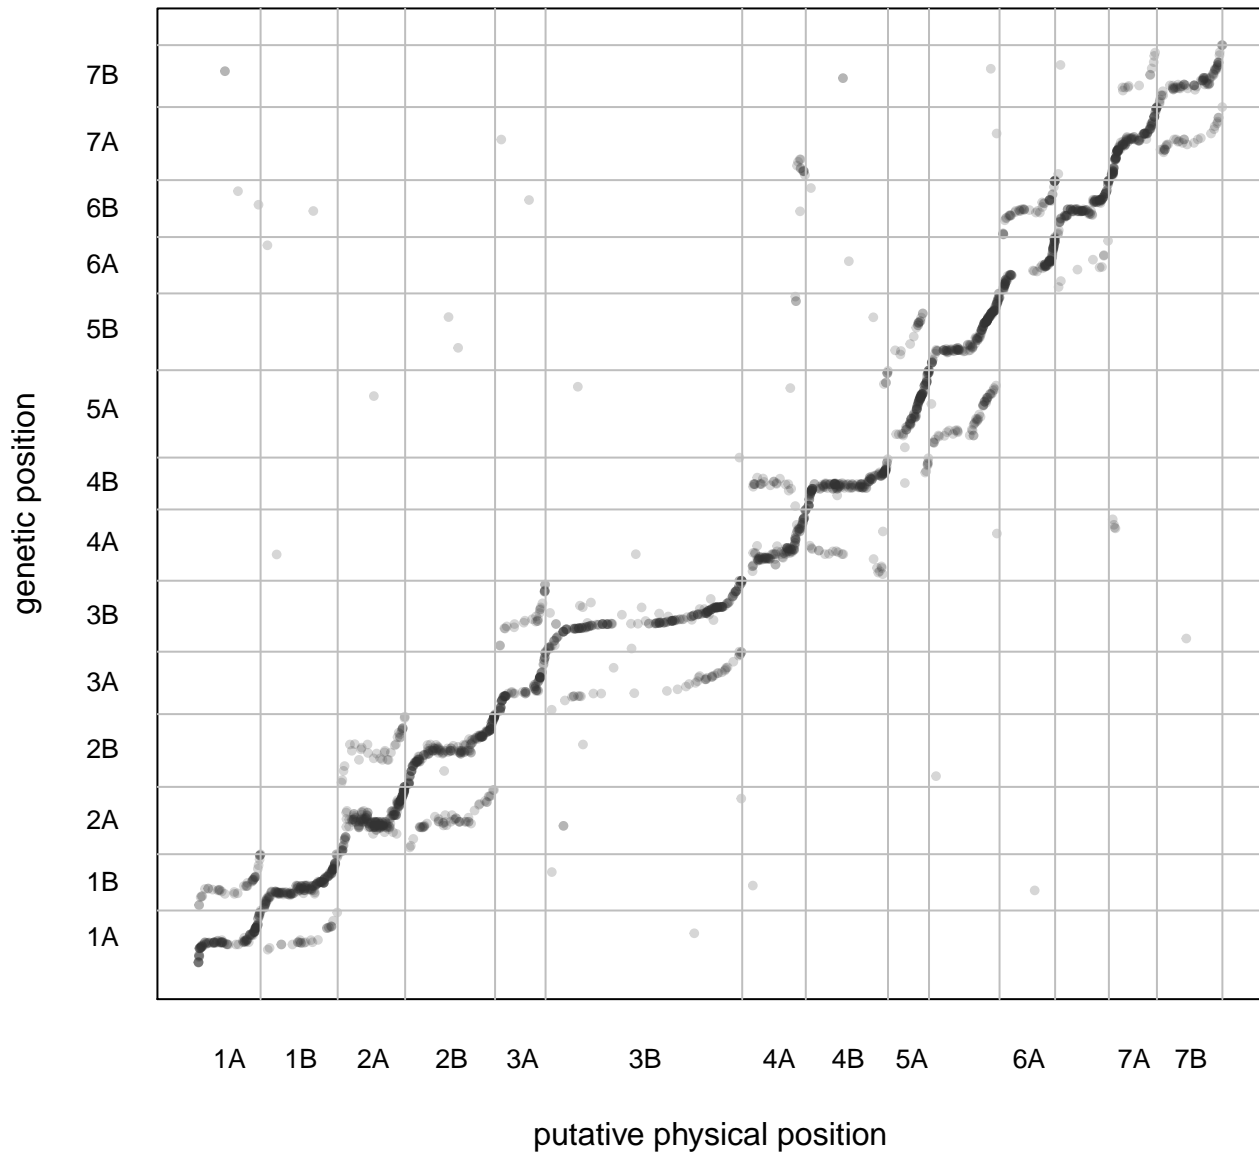

Supplement: pone.0154609.s001.pdf [file pone.0154609.s001.pdf]
