# Supplementary material for: Genotyping by Sequencing Using Specific Allelic Capture to Build a High-Density Genetic Map of Durum Wheat
Source: PLoS One. 2016 May 12;11(5):e0154609. doi: 10.1371/journal.pone.0154609 (PMC4865223; doi:10.1371/journal.pone.0154609)
Supplement: S1 Table — The characteristics of the 25 linkage groups (LG) are presented. For each LG, contigs containing markers are distributed on the 14 A+B chromosomes of the IWGSC reference according to their best blast score (physical putative assignment). For each LG, the percentage of markers with a consistent genetic and putative assignments on the same chromosome are given, as well as the percentage of markers distributed on homeologs and different chromosomes. (XLSX) [file pone.0154609.s007.xlsx]

## Sheet: Feuil1
S1 Table: Putative assignment of markers composing linkage groups
						Putative attribution on chromosome
		Attributed chromosome	LG	Number of marker in the LG	number of marker with putative attribution	1A	1B	2A	2B	3A	3B	4A	4B	5A	5B	6A	6B	7A	7B	Nb of markers with consistency between putative and genetic attribution	Percentage of markers with consistent genetic and physical attribution.	attributed on homeogenome	Percentage of markers physically attributed to the homeolog	Attributed on a different chromosome	Percentage of markers physically attributed to a non homeologous chromosome
		1A	19	217	146	120	25	0	0	0	1	0	0	0	0	0	0	0	0	120	82.1918	25	17.1233	1	0.684932
		1A	11	14	10	10	0	0	0	0	0	0	0	0	0	0	0	0	0	10	100	0	0	0	0
		1B	15	298	228	42	183	0	0	0	1	1	0	0	0	1	0	0	0	183	80.2632	42	18.4211	3	1.31579
		2A	20	403	281	0	0	228	50	0	3	0	0	0	0	0	0	0	0	228	81.1388	50	17.7936	3	1.06762
		2B	18	324	233	0	0	35	196	0	1	0	0	0	1	0	0	0	0	196	84.1202	35	15.0215	2	0.858369
LGs used in the genetic map		3A	21	204	129	0	0	0	0	87	42	0	0	0	0	0	0	0	0	87	67.4419	42	32.5581	0	0
		3B	14	315	246	0	0	0	0	25	220	0	0	0	0	0	0	0	1	220	89.4309	25	10.1626	1	0.406504
		3B	7	22	11	0	0	0	0	2	9	0	0	0	0	0	0	0	0	9	81.8182	2	18.1818	0	0
		4A	13	220	145	0	1	0	0	0	1	118	20	0	1	0	0	4	0	118	81.3793	20	13.7931	7	4.82759
		4A	6	11	5	0	0	0	0	0	0	5	0	0	0	0	0	0	0	5	100	0	0	0	0
		4B	17	274	201	0	0	0	0	0	1	21	171	8	0	0	0	0	0	171	85.0746	21	10.4478	9	4.47761
		4B	8	7	7	0	0	0	0	0	0	1	6	0	0	0	0	0	0	6	85.7143	1	14.2857	0	0
		5A	12	279	169	0	0	1	0	0	1	1	7	107	52	0	0	0	0	107	63.3136	52	30.7692	10	5.91716
		5B	25	280	199	0	0	0	2	0	0	3	1	17	176	0	0	0	0	176	88.4422	17	8.54271	6	3.01508
		6A	22	172	123	0	1	0	0	0	0	0	1	0	0	112	9	0	0	112	91.0569	9	7.31707	2	1.62602
		6B	24	241	170	2	1	0	0	1	0	1	1	0	0	45	119	0	0	119	70	45	26.4706	6	3.52941
		6B	10	12	7	0	0	0	0	0	0	0	0	0	0	4	3	0	0	4	57.1429	3	42.8571	0	0
		7A	23	292	196	0	0	0	0	1	0	11	0	0	1	0	1	153	29	153	78.0612	29	14.7959	14	7.14286
		7B	16	133	90	2	0	0	0	0	0	0	2	0	1	0	1	10	74	74	82.2222	10	11.1111	6	6.66667
		7B	9	8	4	0	0	0	0	0	0	0	0	0	0	0	0	2	2	2	50	2	50	0	0
		7B	5	3	3	0	0	0	0	0	0	0	0	0	0	0	0	0	3	3	100	0	0	0	0
			Sub total	3729	2603															Mean	80.8958	Mean	17.1263	Mean	1.97789
			3	2	2	0	0	0	0	0	0	0	0	0	0	0	0	0	2
LGs NOT used in the genetic map			1	1	1	0	1	0	0	0	0	0	0	0	0	0	0	0	0
			2	1	1	0	0	0	0	0	0	0	0	0	0	0	0	1	0
			4	1	1	0	0	0	0	0	0	0	1	0	0	0	0	0	0
			Sub total	5	5
			Total	3734	2608
